# Supplementary material
Source: Springer Nature journal article supplement (https://www.springermedizin.de/resource/supplementary/12885_2014_4909_MOESM1_ESM.pdf/9467692)

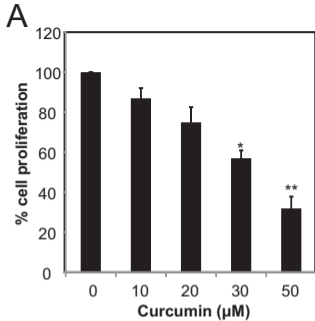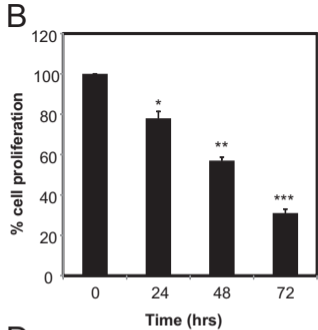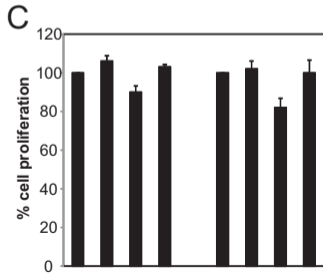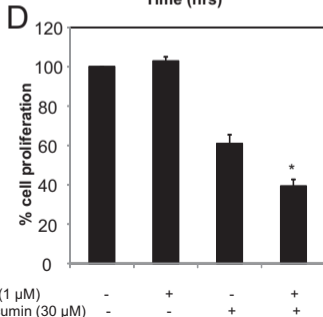

RA ( $\mu\text{M}$ )            -    1    -    1    -    1    -    1  
 Curcumin ( $\mu\text{M}$ )    -    -    10   10   -    -    20   20

RA (1  $\mu\text{M}$ )            -            +            -            +  
 Curcumin (30  $\mu\text{M}$ )    -            -            +            +

Supplement: MOESM1 [file 9467692]
